# Supplementary material for: Carbon dots for photoswitching enzyme catalytic activity
Source: Royal Society of Chemistry journal article supplement (doi:10.1039/c4tb00705k), 2014-06-25
Supplement: c4tb00705k1.pdf [file c4tb00705k1.pdf]

## Carbon dots for photoswitching enzyme catalytic activity

(Supporting information)

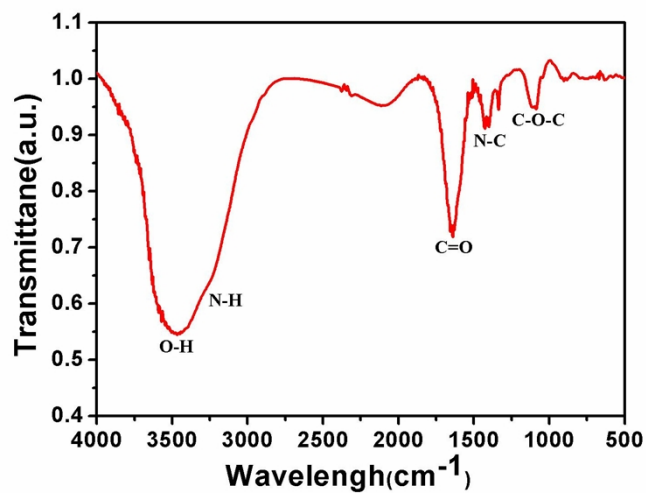

Figure S1. FTIR spectra of CQDs.

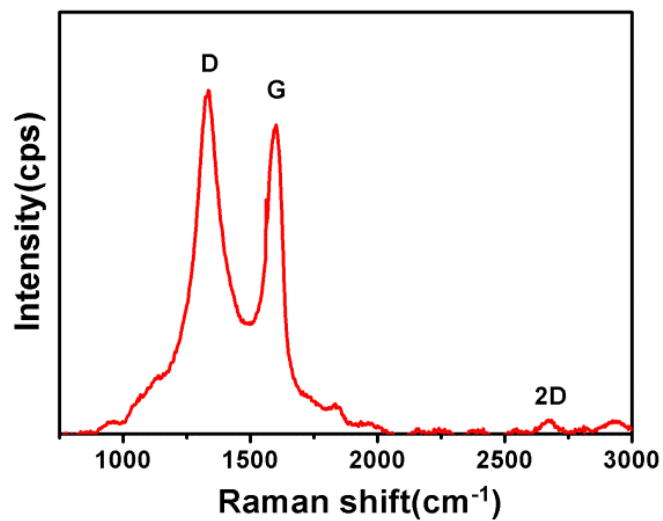

Figure S2. The Raman spectra of CQDs.

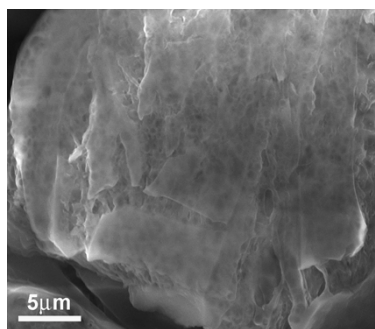

Figure S3. SEM images of free PPL

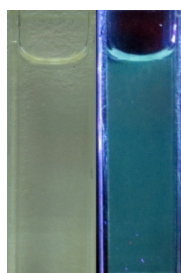

**Figure S4.** The digital photographs of the CQDs under sunlight and UV light

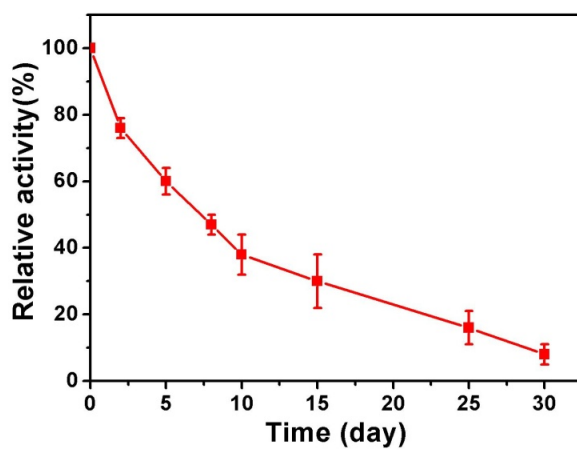

**Figure S5.** Lifetime of PPL/CQDs-Light in PBS (pH 7.0) at 311K.

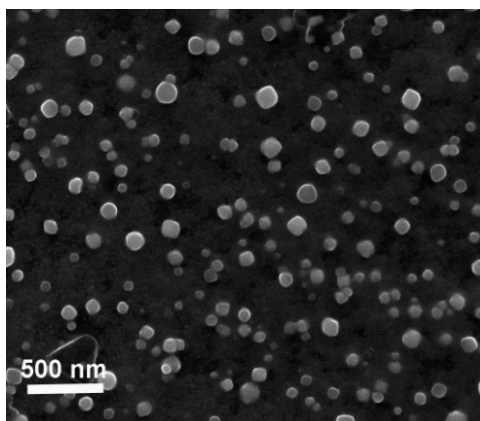

**Figure S6.** SEM image for graphite nanoparticles.

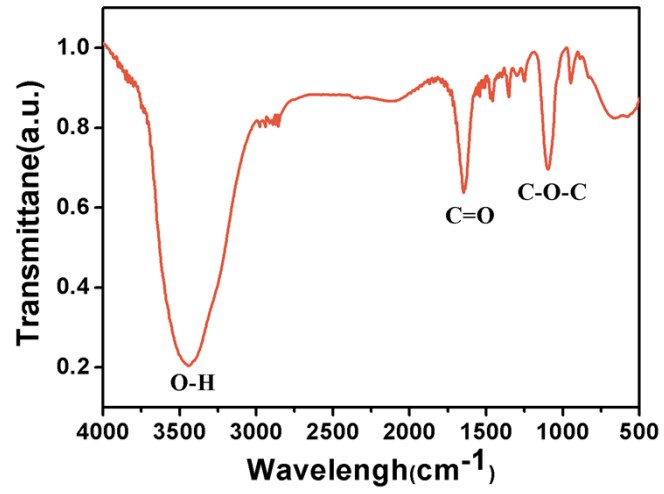

**Figure S7.** The IR spectrum for graphite nanoparticles

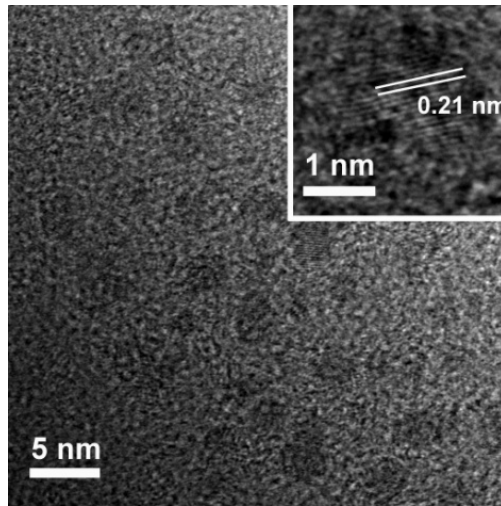

**Figure S8.** TEM image for reduced CQDs.

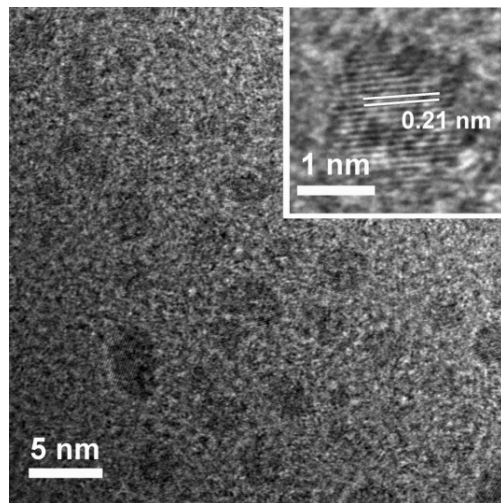

**Figure S9.** TEM image for partial-reduced CQDs.

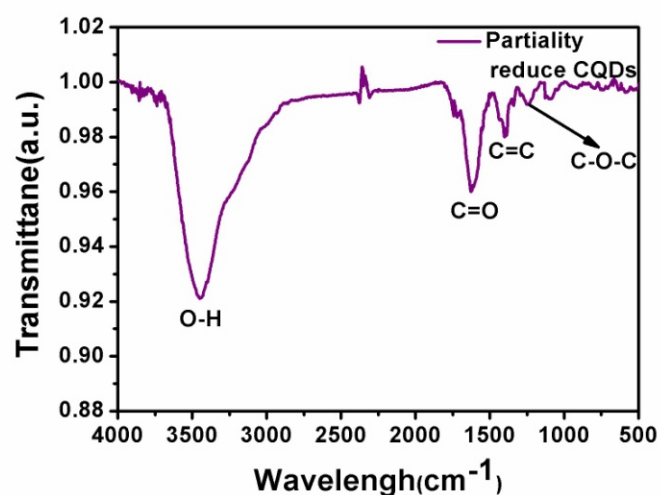

Figure S10. The IR spectrum for partial-reduced CQDs.

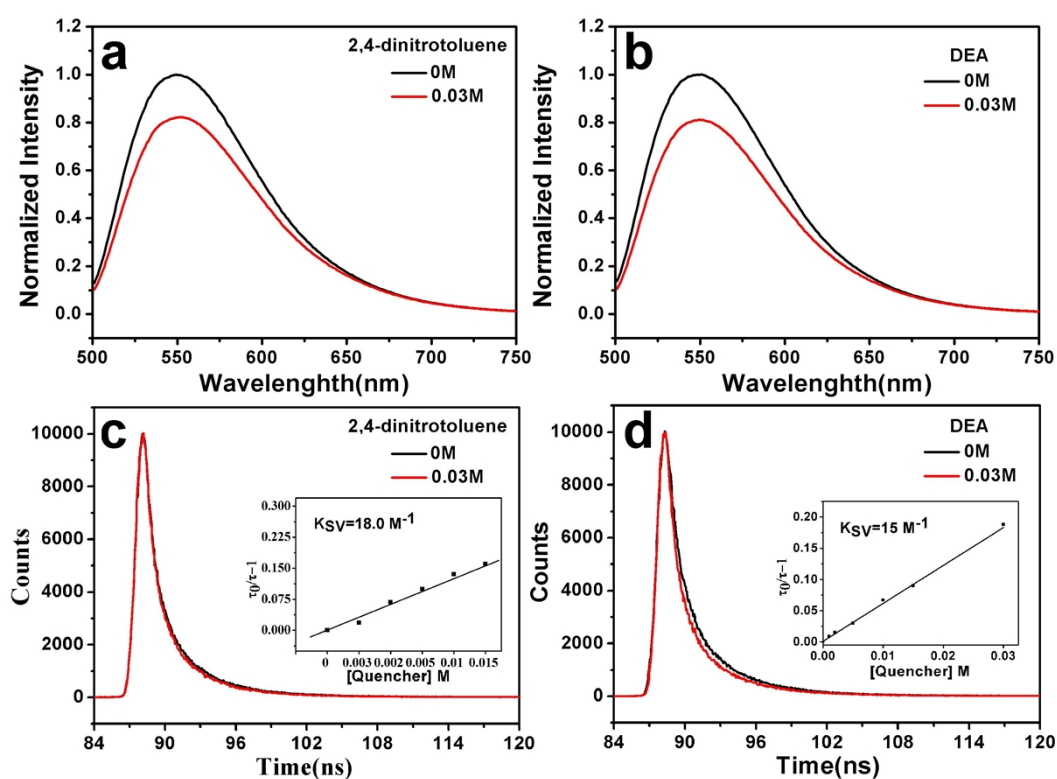

Figure S11. Luminescence decays (485 nm excitation, monitored with 550 nm narrow band pass filter) of the partiality reduce CQDs with (c) 2, 4-dinitrotoluene and (d) DEA. Inset: Stern–Volmer plots for the quenching of luminescence quantum yields (485nm excitation) of the CQDs by (a) 2, 4-dinitrotoluene and (b) DEA.

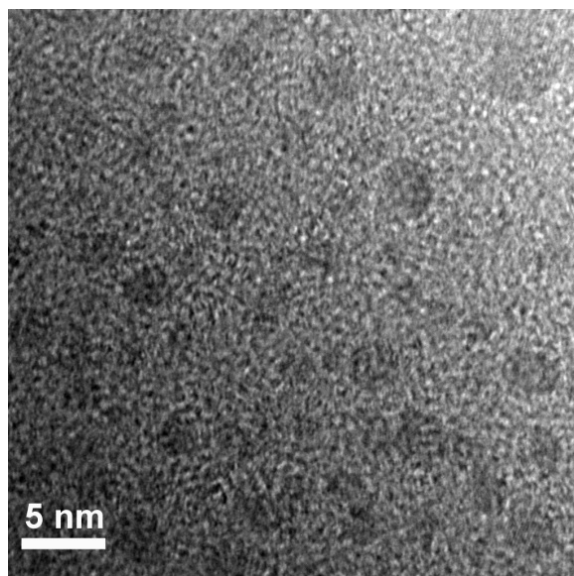

Figure S12. TEM image for other CQDs obtained from glucose by reflux treatment.

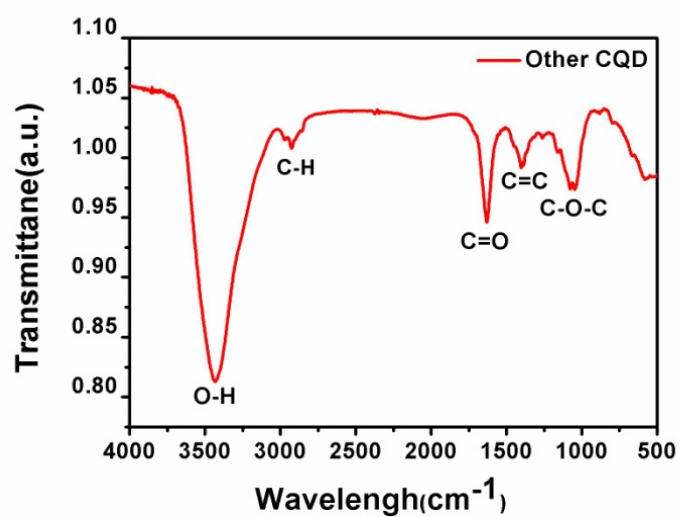

Figure S13. The IR for other CQDs obtained from glucose by reflux treatment.

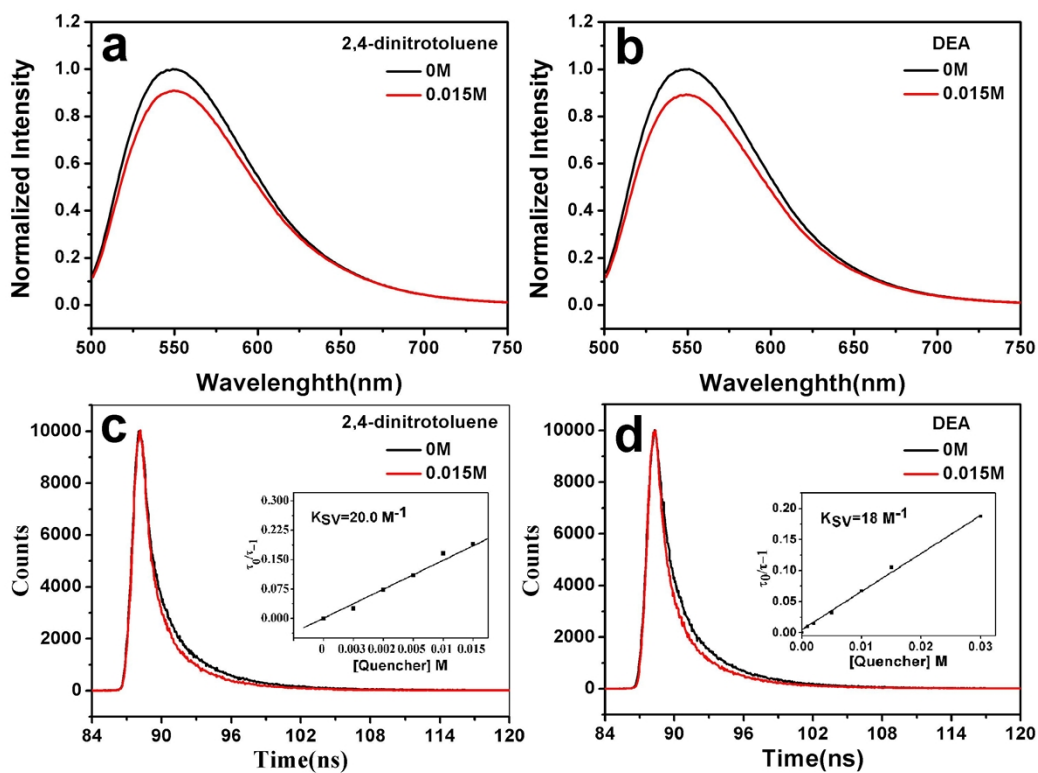

**Figure S14.** Luminescence decays (485 nm excitation, monitored with 550 nm narrow band pass filter) of the other CQDs (CQDs-HCl) with (c) 2, 4-dinitrotoluene and (d) DEA. Inset: Stern–Volmer plots for the quenching of luminescence quantum yields (485nm excitation) of the CQDs by (a) 2, 4-dinitrotoluene and (b) DEA.
